# Supplementary material for: Synthesis of biologically derived poly(pyrogallol) nanofibers for antibacterial applications
Source: Royal Society of Chemistry journal article supplement (doi:10.1039/d3tb00312d), 2023-01-01
Supplement: d3tb00312d1.pdf [file d3tb00312d1.pdf]

Supporting Information

## **Synthesis of biologically-derived polypyrogallol nanofiber for antibacterial application**

Zhen Tian<sup>a</sup>, Guo Wu<sup>a</sup>, Matt Libby<sup>a</sup>, Kang Wu<sup>a</sup>, Kyung Jae Jeong<sup>a</sup>, and Young Jo Kim<sup>a\*</sup>

<sup>a</sup> Department of Chemical Engineering, University of New Hampshire, Durham, NH 03824, USA.

*\* To whom correspondence should be addressed: Fax: 1-603-862-3747; Tel: 1-603-862-2298  
E-mail: [youngjo.kim@unh.edu](mailto:youngjo.kim@unh.edu)*

## ***Table of Contents***

|                                                                                                                                                                                                         |                 |
|---------------------------------------------------------------------------------------------------------------------------------------------------------------------------------------------------------|-----------------|
| <b><i>Table S1. Peak assignments of FT-IR spectra for PG and PPG .....</i></b>                                                                                                                          | <b><i>3</i></b> |
| <b><i>Figure S1. (a) Schematic for the synthesis of poly(pyrogallol). (b) Optical image of Eumelanin pigments. ....</i></b>                                                                             | <b><i>4</i></b> |
| <b><i>Figure S2. The aggregation status of PPG and Mel dispersed in water after 1 minute (a) and 48 hours (b). ....</i></b>                                                                             | <b><i>5</i></b> |
| <b><i>Figure S3. UV–vis-NIR absorption spectra of PPG and Mel dispersed in water. ....</i></b>                                                                                                          | <b><i>6</i></b> |
| <b><i>Figure S4. Raman spectra of Mel. Two broad peaks at about 1380 and 1580 cm<sup>-1</sup> indicate that Mel exhibits semi-crystalline structure similar to that of disordered graphite.....</i></b> | <b><i>7</i></b> |

**Table S1.** Peak assignments of FT-IR spectra for PG and PPG

| Wavenumber (cm <sup>-1</sup> ) <sup>a</sup> |                  | Assignments                                     |
|---------------------------------------------|------------------|-------------------------------------------------|
| PG                                          | PPG              |                                                 |
| 3365, 3223                                  | 3446, 3300       | Phenolic O–H stretching                         |
|                                             | 1590, 1562       | aromatic skeletal vibration of<br>polymer chain |
| 1615, 1519, 1482, 1361                      | 1410, 1378, 1349 | C–C/C=C stretching                              |
| 1286, 1239                                  | 1239             | Phenolic C–O stretching                         |
|                                             | 1278, 1038       | Phenyl ether C–O–C stretching                   |
|                                             | 1012             | Vinyl ether stretching                          |
| 846, 828                                    | 838              | Bending vibration of C–H                        |

<sup>a</sup>Estimated uncertainty =  $\pm 1\text{cm}^{-1}$ .

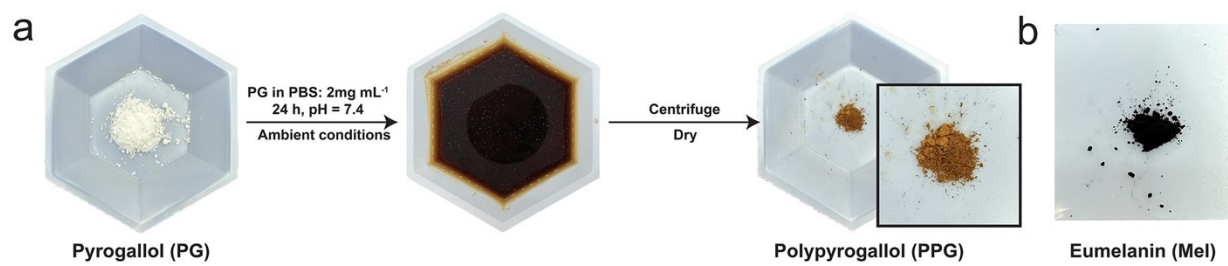

**Figure S1.** (a) Synthesis of poly(pyrogallol) nanofiber. (b) Optical image of eumelanin pigments.

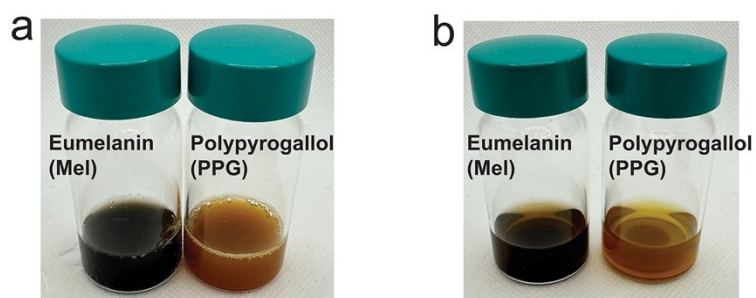

**Figure S2.** Time course aggregation observation of eumelanin (Mel) and PPG during (a) 1 minute and (b) 48 hours.

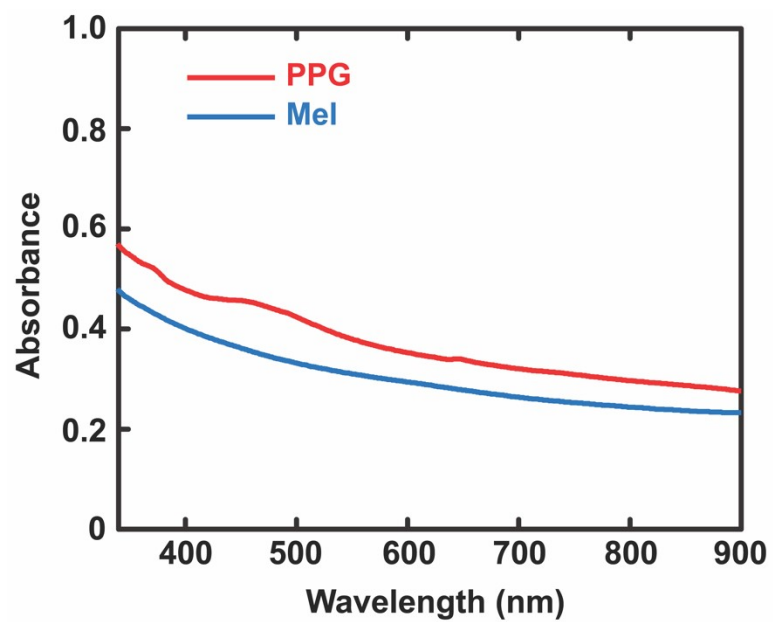

**Figure S3.** *UV-vis-NIR absorption spectra of PPG and Mel dispersed in water.*

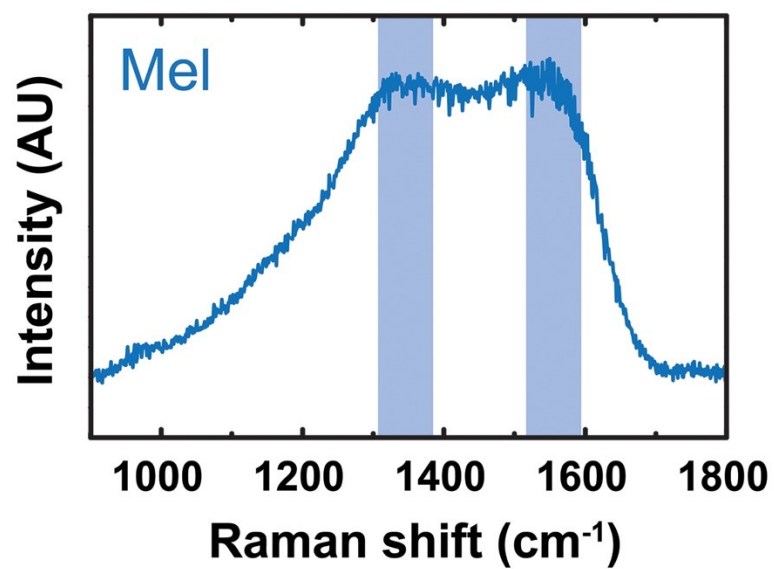

**Figure S4.** Raman spectra of Mel. Two broad peaks at about 1380 and 1580 cm<sup>-1</sup> indicate that Mel exhibits semi-crystalline structure similar to that of disordered graphite.
